# Supplementary material
Source: Springer Nature journal article supplement (https://www.springermedizin.de/resource/supplementary/13037_2012_150_MOESM1_ESM.pdf/9659498)
Supplement: MOESM1 [file 9659498]

Enrollment

**Assessed for Eligibility  
238**

**Excluded = 48**

- Nickel allergy = 4
- Declined participation = 35
- Withdrew consent = 2
- Missed = 7 (enrolled patient not randomized)

**Randomized  
190**

Allocation

**Sutures Intervention = 97**

- Received intervention = 96
- Did not receive allocated intervention = 1

**Staples Intervention = 93**

- Received intervention = 93
- Did not receive allocated intervention = 0

Follow-up

Lost to Follow-up = 28  
Discontinued intervention = 0

Lost to Follow-up = 14  
Discontinued intervention = 0

Analysis

Analyzed = 69  
• Excluded from analysis = 0

Analyzed = 79  
• Excluded from analysis = 0
